# Supplementary material for: Healthy Grandparenthood: How Long Is It, and How Has It Changed?
Source: Springer Nature journal article supplement (doi:10.1007/s13524-017-0620-0), 2017-10-10

**Online Resource 1**

Figure S1. Percentage with Grandchildren, Percentage in Good Health by Sex, US A1a. by Education

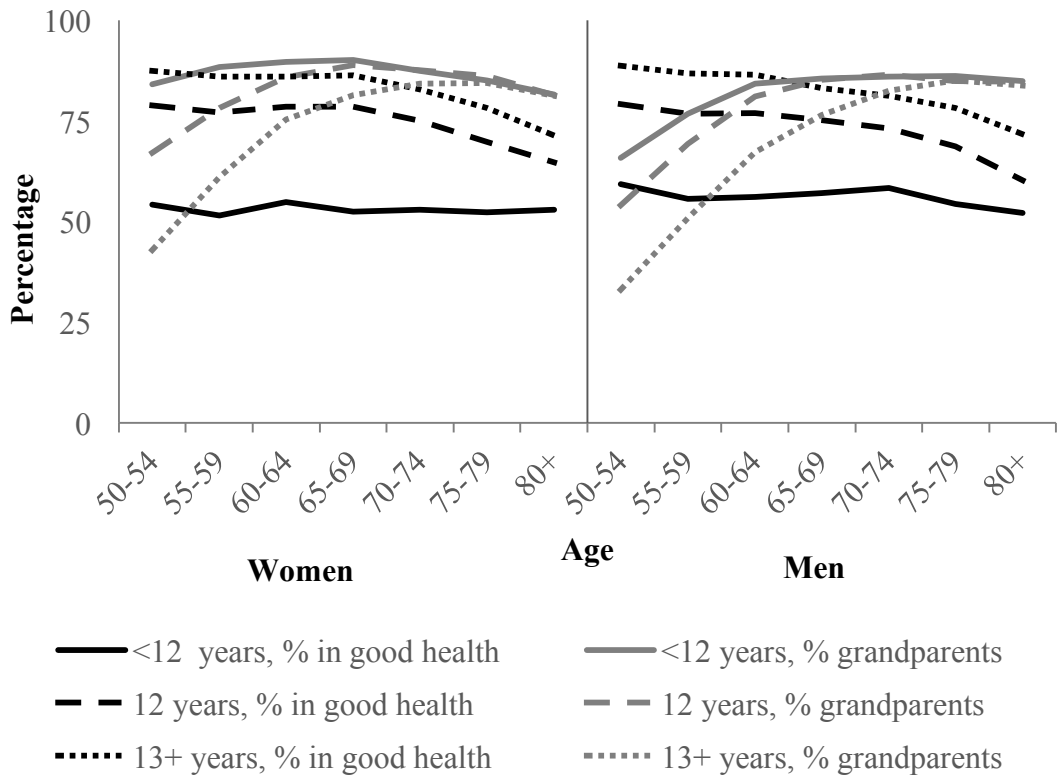

A1b. by Race/Ethnicity

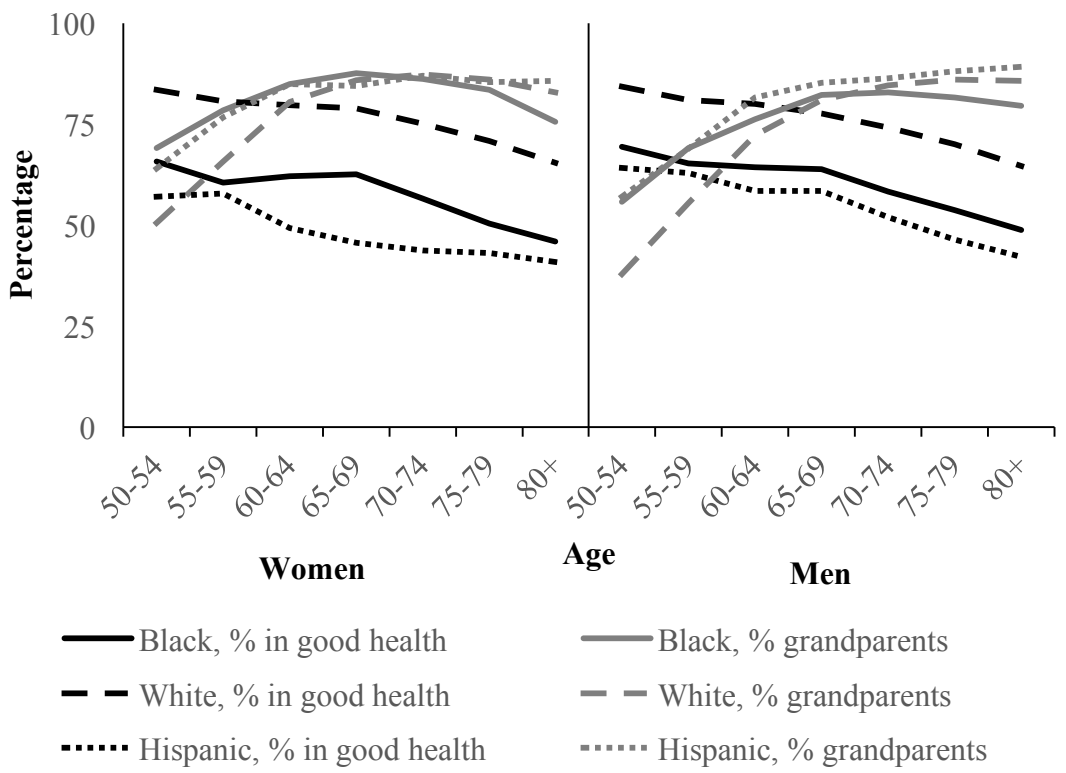

Supplement: MOESM1 [file 15125702]
